# Supplementary material for: Preparation of pH-responsive mesoporous hydroxyapatite nanoparticles for intracellular controlled release of an anticancer drug
Source: Royal Society of Chemistry journal article supplement (doi:10.1039/c5bm00228a), 2015-10-20
Supplement: c5bm00228a1.pdf [file c5bm00228a1.pdf]

**Electronic Supplementary Materials (ESI) for Biomaterials Science**

**Supporting Information**

**Preparation of pH-responsive mesoporous hydroxyapatite  
nanoparticles with intracellular controlled release  
anticancer drug**

Dalong Li,<sup>a</sup> Xin Huang,<sup>a</sup> Yadong Wu,<sup>a</sup> Jiwei Li,<sup>a</sup> Weilu Cheng,<sup>a</sup> Jinmei He,<sup>a</sup> Huayu  
Tian<sup>b</sup> and Yudong Huang<sup>\*ac</sup>

<sup>a</sup> *School of Chemical Engineering and Technology, Harbin Institute of Technology,  
Harbin, 150001, China*

<sup>b</sup> *Key Laboratory of Polymer Ecomaterials, Changchun Institute of Applied Chemistry,  
Chinese Academy of Sciences, Changchun, 130022, China*

<sup>c</sup> *State Key Laboratory of Urban Water Resource and Environment, Harbin Institute  
of Technology, Harbin, 150001, China*

---

\* Corresponding author. Tel.: +86-451-86414806; Fax: +86-451-86414806  
E-mail address: 12B925006@hit.edu.cn (Yudong Huang)

## Experimental

### Measurement of phosphorus concentration by the molybdenum blue method

10 mg of DOX@MHAPNs and DOX@PAA-MHAPNs were mixed with acetate buffer solutions (10 mM, 4 mL, pH 5.0, 6.5 or 7.4). After stirring for 1 h at 37 °C, the solution was taken out and diluted to 100 mL. 0.8 mL of DOX@MHAPNs and DOX@PAA-MHAPNs solution were added to 50 mL tube, next 10 mL of the molybdenum solution was added, respectively. After reaction for 24 and 48 h, the absorption at 880 nm was read to determine the concentration of the phosphorus. The calibration curve was done using  $\text{KH}_2\text{PO}_4$  as a reference. Every experiment was repeated for three times. (Table S1 and Fig. S2)

## Results and Discussion

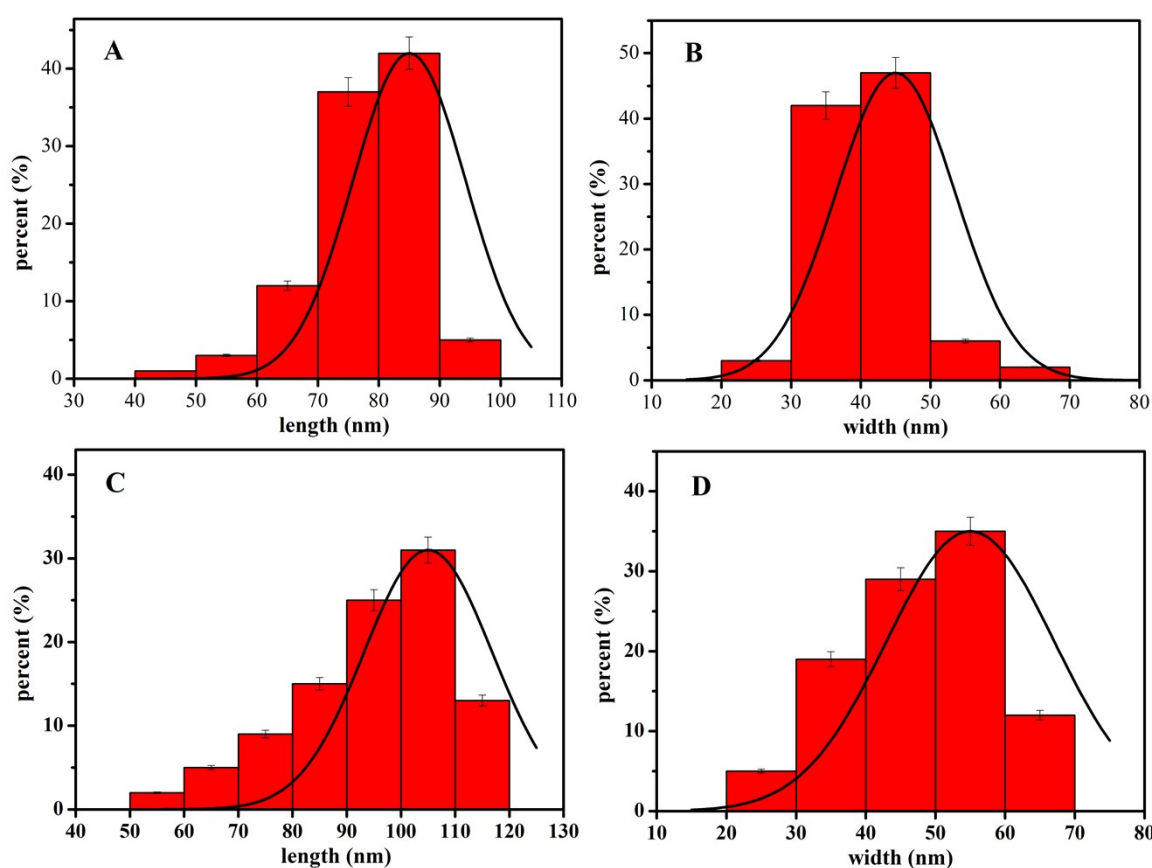

Fig. S1. The standard deviation of both the length and width measurement of MHAPNs (A and B) and PAA-MHAPNs (C and D).

Table S1 Value of standard operating curve

| Mass concentration of Phosphorus ( $\mu\text{g}/50\text{ mL}$ ) | Absorption value |
|-----------------------------------------------------------------|------------------|
| 0                                                               | 183.46           |
| 5                                                               | 0.00             |
| 10                                                              | 0.0562           |
| 30                                                              | 0.3289           |
| 50                                                              | 0.5612           |
| 70                                                              | 0.7323           |
| 90                                                              | 0.9431           |

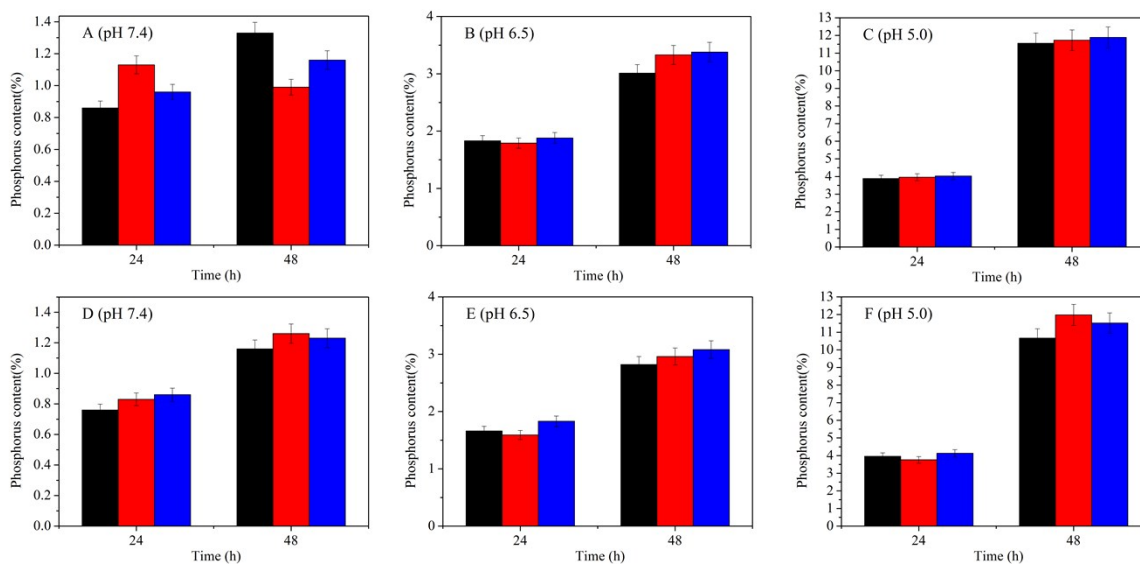

Fig. S2. The measurement results of phosphorus content for DOX@MHAPNs (A, B and C) and DOX@PAA-MHAPNs (D, E and F) (n=3)
